# Supplementary material for: Oral Health Status, Knowledge, and Behaviours of People with Diabetes in Sydney, Australia
Source: MDPI journal article supplement (doi:10.3390/ijerph18073464), 2021-03-26
Supplement: s1 [file s1]

SURVEY QUESTIONNAIREDIABETES AND ORAL HEALTH (DIOH) RESEARCH

Please answer all questions.

### 1. DENTAL HEALTH STATUS

First, some questions about your dental health.

1. How would you describe the health of your teeth and mouth? *Mark ☒ one box.*

☐<sub>1</sub> Excellent    ☐<sub>2</sub> Very Good    ☐<sub>3</sub> Good    ☐<sub>4</sub> Fair    ☐<sub>5</sub> Poor

2. Do you currently have any problems or concerns with your teeth, gums or mouth?

☐<sub>1</sub> Yes    ☐<sub>2</sub> No

If yes, what are your main problems/concerns? (*Mark ☒ all that apply*)

Bleeding gums ☐<sub>1</sub>

Pain in your teeth and/or gums ☐<sub>2</sub>

Gaps between your teeth ☐<sub>3</sub>

Loose teeth ☐<sub>4</sub>

Dry mouth ☐<sub>5</sub>

Bad taste or smell in your mouth ☐<sub>6</sub>

Other problems \_\_\_\_\_ ☐<sub>7</sub>

3. The following statements relate to issues you might have faced because of dental problems.

Please indicate how often you have faced these issues. *Mark ☒ one box for each question.*

|                                                                                                                    | Never                                 | Hardly ever                           | Occasionally                          | Fairly often                          | Very often                            |
|--------------------------------------------------------------------------------------------------------------------|---------------------------------------|---------------------------------------|---------------------------------------|---------------------------------------|---------------------------------------|
| Have you had trouble <i>pronouncing any words</i> because of problems with your teeth, mouth or dentures?          | <input type="checkbox"/> <sub>1</sub> | <input type="checkbox"/> <sub>2</sub> | <input type="checkbox"/> <sub>3</sub> | <input type="checkbox"/> <sub>4</sub> | <input type="checkbox"/> <sub>5</sub> |
| Have you felt that your <i>sense of taste</i> has worsened because of problems with your teeth, mouth or dentures? | <input type="checkbox"/> <sub>1</sub> | <input type="checkbox"/> <sub>2</sub> | <input type="checkbox"/> <sub>3</sub> | <input type="checkbox"/> <sub>4</sub> | <input type="checkbox"/> <sub>5</sub> |
| Have you had a <i>painful aching</i> in your mouth?                                                                | <input type="checkbox"/> <sub>1</sub> | <input type="checkbox"/> <sub>2</sub> | <input type="checkbox"/> <sub>3</sub> | <input type="checkbox"/> <sub>4</sub> | <input type="checkbox"/> <sub>5</sub> |
| Have you found it <i>uncomfortable to eat any foods</i> because of problems with your teeth, mouth or dentures?    | <input type="checkbox"/> <sub>1</sub> | <input type="checkbox"/> <sub>2</sub> | <input type="checkbox"/> <sub>3</sub> | <input type="checkbox"/> <sub>4</sub> | <input type="checkbox"/> <sub>5</sub> |
| Have you been <i>self-conscious</i> because of your teeth, mouth or dentures?                                      | <input type="checkbox"/> <sub>1</sub> | <input type="checkbox"/> <sub>2</sub> | <input type="checkbox"/> <sub>3</sub> | <input type="checkbox"/> <sub>4</sub> | <input type="checkbox"/> <sub>5</sub> |
| Have you <i>felt tense</i> because of problems with your teeth, mouth or dentures?                                 | <input type="checkbox"/> <sub>1</sub> | <input type="checkbox"/> <sub>2</sub> | <input type="checkbox"/> <sub>3</sub> | <input type="checkbox"/> <sub>4</sub> | <input type="checkbox"/> <sub>5</sub> |

|                                                                                                                       |                                       |                                       |                                       |                                       |                                       |
|-----------------------------------------------------------------------------------------------------------------------|---------------------------------------|---------------------------------------|---------------------------------------|---------------------------------------|---------------------------------------|
| Has your <i>diet been unsatisfactory</i> because of problems with your teeth, mouth or dentures?                      | <input type="checkbox"/> <sub>1</sub> | <input type="checkbox"/> <sub>2</sub> | <input type="checkbox"/> <sub>3</sub> | <input type="checkbox"/> <sub>4</sub> | <input type="checkbox"/> <sub>5</sub> |
| Have you had to <i>interrupt meals</i> because of problems with your teeth, mouth or dentures?                        | <input type="checkbox"/> <sub>1</sub> | <input type="checkbox"/> <sub>2</sub> | <input type="checkbox"/> <sub>3</sub> | <input type="checkbox"/> <sub>4</sub> | <input type="checkbox"/> <sub>5</sub> |
| Have you found it <i>difficult to relax</i> because of problems with your teeth, mouth or dentures?                   | <input type="checkbox"/> <sub>1</sub> | <input type="checkbox"/> <sub>2</sub> | <input type="checkbox"/> <sub>3</sub> | <input type="checkbox"/> <sub>4</sub> | <input type="checkbox"/> <sub>5</sub> |
| Have you been a bit <i>embarrassed</i> because of problems with your teeth, mouth or dentures?                        | <input type="checkbox"/> <sub>1</sub> | <input type="checkbox"/> <sub>2</sub> | <input type="checkbox"/> <sub>3</sub> | <input type="checkbox"/> <sub>4</sub> | <input type="checkbox"/> <sub>5</sub> |
| Have you been a bit <i>irritable with other people</i> because of problems with your teeth, mouth or dentures?        | <input type="checkbox"/> <sub>1</sub> | <input type="checkbox"/> <sub>2</sub> | <input type="checkbox"/> <sub>3</sub> | <input type="checkbox"/> <sub>4</sub> | <input type="checkbox"/> <sub>5</sub> |
| Have you had <i>difficulty doing your usual jobs</i> because of problems with your teeth, mouth or dentures?          | <input type="checkbox"/> <sub>1</sub> | <input type="checkbox"/> <sub>2</sub> | <input type="checkbox"/> <sub>3</sub> | <input type="checkbox"/> <sub>4</sub> | <input type="checkbox"/> <sub>5</sub> |
| Have you felt that life in general was <i>less satisfying</i> because of problems with your teeth, mouth or dentures? | <input type="checkbox"/> <sub>1</sub> | <input type="checkbox"/> <sub>2</sub> | <input type="checkbox"/> <sub>3</sub> | <input type="checkbox"/> <sub>4</sub> | <input type="checkbox"/> <sub>5</sub> |
| Have you been <i>totally unable to function</i> because of problems with your teeth, mouth or dentures?               | <input type="checkbox"/> <sub>1</sub> | <input type="checkbox"/> <sub>2</sub> | <input type="checkbox"/> <sub>3</sub> | <input type="checkbox"/> <sub>4</sub> | <input type="checkbox"/> <sub>5</sub> |

## 2. KNOWLEDGE ABOUT DENTAL HEALTH

4. Please choose an answer for the following questions based on your current knowledge. Mark ☒ *one box for each statement.*

|                                                                                                                         | True                                  | False                                 | Don't know                            |
|-------------------------------------------------------------------------------------------------------------------------|---------------------------------------|---------------------------------------|---------------------------------------|
| Diabetes does not affect your teeth and gums                                                                            | <input type="checkbox"/> <sub>1</sub> | <input type="checkbox"/> <sub>2</sub> | <input type="checkbox"/> <sub>3</sub> |
| Some medications for diabetes can cause people to experience dry mouth                                                  | <input type="checkbox"/> <sub>1</sub> | <input type="checkbox"/> <sub>2</sub> | <input type="checkbox"/> <sub>3</sub> |
| People with dry mouth have a lower risk of having a sore in the mouth                                                   | <input type="checkbox"/> <sub>1</sub> | <input type="checkbox"/> <sub>2</sub> | <input type="checkbox"/> <sub>3</sub> |
| People with dry mouth are more likely to have tooth decay                                                               | <input type="checkbox"/> <sub>1</sub> | <input type="checkbox"/> <sub>2</sub> | <input type="checkbox"/> <sub>3</sub> |
| Flossing should be done daily to clean between teeth                                                                    | <input type="checkbox"/> <sub>1</sub> | <input type="checkbox"/> <sub>2</sub> | <input type="checkbox"/> <sub>3</sub> |
| If your gums bleed every time you brush your teeth, it is an early sign of gum disease.                                 | <input type="checkbox"/> <sub>1</sub> | <input type="checkbox"/> <sub>2</sub> | <input type="checkbox"/> <sub>3</sub> |
| Gum disease can lead to loss of teeth                                                                                   | <input type="checkbox"/> <sub>1</sub> | <input type="checkbox"/> <sub>2</sub> | <input type="checkbox"/> <sub>3</sub> |
| Gum disease does not affect the blood glucose control                                                                   | <input type="checkbox"/> <sub>1</sub> | <input type="checkbox"/> <sub>2</sub> | <input type="checkbox"/> <sub>3</sub> |
| People with diabetes should only see a dentist when there is an emergency                                               | <input type="checkbox"/> <sub>1</sub> | <input type="checkbox"/> <sub>2</sub> | <input type="checkbox"/> <sub>3</sub> |
| Getting treatment of gum disease (deep cleaning of your tooth and root surface) does not help for blood glucose control | <input type="checkbox"/> <sub>1</sub> | <input type="checkbox"/> <sub>2</sub> | <input type="checkbox"/> <sub>3</sub> |

### 3. ATTITUDES TOWARD DIABETES AND DENTAL HEALTH

5. How would you describe the importance of the following activities? *For each statement, mark ☒ one box that comes closest to the way you think.*

|                                                                               | Very<br>important                     | Fairly<br>important                   | Important                             | Slightly<br>important                 | Least<br>important                    |
|-------------------------------------------------------------------------------|---------------------------------------|---------------------------------------|---------------------------------------|---------------------------------------|---------------------------------------|
| Doing exercise regularly                                                      | <input type="checkbox"/> <sub>1</sub> | <input type="checkbox"/> <sub>2</sub> | <input type="checkbox"/> <sub>3</sub> | <input type="checkbox"/> <sub>4</sub> | <input type="checkbox"/> <sub>5</sub> |
| Eating a healthy diet                                                         | <input type="checkbox"/> <sub>1</sub> | <input type="checkbox"/> <sub>2</sub> | <input type="checkbox"/> <sub>3</sub> | <input type="checkbox"/> <sub>4</sub> | <input type="checkbox"/> <sub>5</sub> |
| Brushing teeth twice a day                                                    | <input type="checkbox"/> <sub>1</sub> | <input type="checkbox"/> <sub>2</sub> | <input type="checkbox"/> <sub>3</sub> | <input type="checkbox"/> <sub>4</sub> | <input type="checkbox"/> <sub>5</sub> |
| Use of floss/interdental brush to clean<br>between teeth at least once a week | <input type="checkbox"/> <sub>1</sub> | <input type="checkbox"/> <sub>2</sub> | <input type="checkbox"/> <sub>3</sub> | <input type="checkbox"/> <sub>4</sub> | <input type="checkbox"/> <sub>5</sub> |
| Visit a dentist at least once a year                                          | <input type="checkbox"/> <sub>1</sub> | <input type="checkbox"/> <sub>2</sub> | <input type="checkbox"/> <sub>3</sub> | <input type="checkbox"/> <sub>4</sub> | <input type="checkbox"/> <sub>5</sub> |
| Visit a GP/diabetes specialist regularly                                      | <input type="checkbox"/> <sub>1</sub> | <input type="checkbox"/> <sub>2</sub> | <input type="checkbox"/> <sub>3</sub> | <input type="checkbox"/> <sub>4</sub> | <input type="checkbox"/> <sub>5</sub> |
| Keeping good control of your diabetes                                         | <input type="checkbox"/> <sub>1</sub> | <input type="checkbox"/> <sub>2</sub> | <input type="checkbox"/> <sub>3</sub> | <input type="checkbox"/> <sub>4</sub> | <input type="checkbox"/> <sub>5</sub> |

6. These questions are about how you feel about your teeth and gum. *For each question, mark ☒ one box that comes closest to the way you feel.*

|                                                                                                        | Strongly<br>agree                     | Agree                                 | Disagree                              | Strongly<br>disagree                  |
|--------------------------------------------------------------------------------------------------------|---------------------------------------|---------------------------------------|---------------------------------------|---------------------------------------|
| Taking care of my teeth and gums is as<br>important as taking care of my general health.               | <input type="checkbox"/> <sub>1</sub> | <input type="checkbox"/> <sub>2</sub> | <input type="checkbox"/> <sub>3</sub> | <input type="checkbox"/> <sub>4</sub> |
| If someone tells me that I am at risk of teeth<br>and gum problems, I will regularly see a<br>dentist. | <input type="checkbox"/> <sub>1</sub> | <input type="checkbox"/> <sub>2</sub> | <input type="checkbox"/> <sub>3</sub> | <input type="checkbox"/> <sub>4</sub> |

### 4. DENTAL CARE PRACTICES

*The following questions are about your dental care behaviours.*

7. Have you seen a dentist within the last 12 months? *Mark ☒ one box.*

☐<sub>1</sub> Yes

☐<sub>2</sub> No ➔ **go to Q9**

8. What was the main reason you last visited the dentist? *Mark ☒ all that apply.*

Check-up/exam/cleaning

☐<sub>1</sub>

Dental problems

☐<sub>2</sub>

Other \_\_\_\_\_

☐<sub>3</sub>

Don't know

☐<sub>4</sub>

9. What was the main reason behind not visiting dentist? Mark ☒ all that apply.

- |                                                                                |                                        |
|--------------------------------------------------------------------------------|----------------------------------------|
| Could not afford the cost                                                      | <input type="checkbox"/> <sub>1</sub>  |
| Did not want to spend the money                                                | <input type="checkbox"/> <sub>2</sub>  |
| Insurance did not cover treatments                                             | <input type="checkbox"/> <sub>3</sub>  |
| Dental office is too far away                                                  | <input type="checkbox"/> <sub>4</sub>  |
| Dental office is not open at convenient times                                  | <input type="checkbox"/> <sub>5</sub>  |
| Afraid or do not like dentist                                                  | <input type="checkbox"/> <sub>6</sub>  |
| Unable to take off time from work                                              | <input type="checkbox"/> <sub>7</sub>  |
| Too busy                                                                       | <input type="checkbox"/> <sub>8</sub>  |
| I did not have any dental problems                                             | <input type="checkbox"/> <sub>9</sub>  |
| I did not think anything serious was wrong/expected dental problems to go away | <input type="checkbox"/> <sub>10</sub> |
| Other _____                                                                    | <input type="checkbox"/> <sub>11</sub> |
| Don't know                                                                     | <input type="checkbox"/> <sub>12</sub> |

10. In your last visit, did dentist tell you about benefits of: Mark ☒ one box in each statement.

- |                                                    |                                           |                                          |                                                  |
|----------------------------------------------------|-------------------------------------------|------------------------------------------|--------------------------------------------------|
| a. Checking your blood sugar.                      | <input type="checkbox"/> <sub>1</sub> Yes | <input type="checkbox"/> <sub>2</sub> No | <input type="checkbox"/> <sub>3</sub> Don't know |
| b. Giving up cigarettes or other types of tobacco. | <input type="checkbox"/> <sub>1</sub> Yes | <input type="checkbox"/> <sub>2</sub> No | <input type="checkbox"/> <sub>3</sub> Don't know |

11. How often do you brush your teeth? Mark ☒ one box.

- |                       |                                       |
|-----------------------|---------------------------------------|
| More than twice a day | <input type="checkbox"/> <sub>1</sub> |
| Twice a day           | <input type="checkbox"/> <sub>2</sub> |
| Once a day            | <input type="checkbox"/> <sub>3</sub> |
| A few times a week    | <input type="checkbox"/> <sub>4</sub> |
| Never                 | <input type="checkbox"/> <sub>5</sub> |

12. Which of the following do you use? Mark ☒ all that apply.

- |                        |                                       |
|------------------------|---------------------------------------|
| Fluoride toothpaste    | <input type="checkbox"/> <sub>1</sub> |
| Mouthwash              | <input type="checkbox"/> <sub>2</sub> |
| Sugar free chewing gum | <input type="checkbox"/> <sub>3</sub> |
| None                   | <input type="checkbox"/> <sub>4</sub> |

13. In the last seven days, how many days did you use dental floss/interdental brush to clean between your teeth?

Enter number of days

## 5. DIABETES CARE PRACTICES

14. During the past 12 months, how many times have you seen the following health care professional for your diabetes?

- |                                          |                       |                      |                               |
|------------------------------------------|-----------------------|----------------------|-------------------------------|
| <sup>1</sup> Diabetes Educators          | Enter number of times | <input type="text"/> | None <input type="checkbox"/> |
| <sup>2</sup> Diabetes Specialist         | Enter number of times | <input type="text"/> | None <input type="checkbox"/> |
| <sup>3</sup> General Practitioners (GPs) | Enter number of times | <input type="text"/> | None <input type="checkbox"/> |
| <sup>4</sup> Dietitian/Nutritionist      | Enter number of times | <input type="text"/> | None <input type="checkbox"/> |
| <sup>5</sup> Other _____                 | Enter number of times | <input type="text"/> | None <input type="checkbox"/> |

15. Have you ever received any information about teeth and gums from your diabetes care providers (such as, diabetes educators, GPs/specialist and dietitians)? *Mark ☒ one box.*

☐ <sup>1</sup> Yes      ☐ <sup>2</sup> No → **go to Q16**

a. What information/service did you receive? *Mark ☒ all that apply.*

- |                                                                                  |                                                                                    |
|----------------------------------------------------------------------------------|------------------------------------------------------------------------------------|
| <sup>1</sup> Examination/looking of your teeth and gums                          | <input type="checkbox"/> <sup>1</sup> Yes <input type="checkbox"/> <sup>2</sup> No |
| <sup>2</sup> Brushing your teeth regularly                                       | <input type="checkbox"/> <sup>1</sup> Yes <input type="checkbox"/> <sup>2</sup> No |
| <sup>3</sup> Clean between your teeth using floss or interdental brush regularly | <input type="checkbox"/> <sup>1</sup> Yes <input type="checkbox"/> <sup>2</sup> No |
| <sup>4</sup> Visit to a dentist or dental hygienist every year                   | <input type="checkbox"/> <sup>1</sup> Yes <input type="checkbox"/> <sup>2</sup> No |
| <sup>5</sup> Brochure/pamphlet about diabetes and dental health                  | <input type="checkbox"/> <sup>1</sup> Yes <input type="checkbox"/> <sup>2</sup> No |
| <sup>6</sup> Referral letter to a dentist                                        | <input type="checkbox"/> <sup>1</sup> Yes <input type="checkbox"/> <sup>2</sup> No |
| <sup>7</sup> If other, please specify _____                                      |                                                                                    |

b. Who provided you information/service about teeth and gums? *Mark ☒ all that apply.*

- |                             |                                       |
|-----------------------------|---------------------------------------|
| Diabetes Educators          | <input type="checkbox"/> <sup>1</sup> |
| Diabetes Specialist         | <input type="checkbox"/> <sup>2</sup> |
| General Practitioners (GPs) | <input type="checkbox"/> <sup>3</sup> |
| Dietitian/Nutritionist      | <input type="checkbox"/> <sup>4</sup> |
| Other _____                 | <input type="checkbox"/> <sup>5</sup> |
| Cannot recall               | <input type="checkbox"/> <sup>6</sup> |

16. How would you think the following services provided by diabetes care providers (such as, diabetes educators, GPs/specialist and dietitians)? *Mark ☒ one box to each statement.*

|                                                                                                                 | Yes                                   | No                                    | Don't know                            |
|-----------------------------------------------------------------------------------------------------------------|---------------------------------------|---------------------------------------|---------------------------------------|
| Do you think diabetes care providers could help you to identify teeth and gum problems?                         | <input type="checkbox"/> <sub>1</sub> | <input type="checkbox"/> <sub>2</sub> | <input type="checkbox"/> <sub>3</sub> |
| Would you consider advice related to teeth and gum given by diabetes care providers?                            | <input type="checkbox"/> <sub>1</sub> | <input type="checkbox"/> <sub>2</sub> | <input type="checkbox"/> <sub>3</sub> |
| Do you think diabetes care providers have good knowledge about teeth and gums to advise you?                    | <input type="checkbox"/> <sub>1</sub> | <input type="checkbox"/> <sub>2</sub> | <input type="checkbox"/> <sub>3</sub> |
| Would you make an appointment to see a dentist if you were given a dental referral by a diabetes care provider? | <input type="checkbox"/> <sub>1</sub> | <input type="checkbox"/> <sub>2</sub> | <input type="checkbox"/> <sub>3</sub> |

17. Which of the following health care professionals would be the most appropriate to provide you information about teeth and gums? *Mark ☒ one box.*

|                         |                                       |
|-------------------------|---------------------------------------|
| Diabetes Educator       | <input type="checkbox"/> <sub>1</sub> |
| GPs/diabetes Specialist | <input type="checkbox"/> <sub>2</sub> |
| Dietitian               | <input type="checkbox"/> <sub>3</sub> |
| Don't know              | <input type="checkbox"/> <sub>4</sub> |

18. How likely are you to participate in these services if they are provided by diabetes educators? *Mark ☒ one box to each statement.*

|                                                                                               | Extremely likely                      | Very likely                           | Likely                                | Not very likely                       | Not likely at all                     |
|-----------------------------------------------------------------------------------------------|---------------------------------------|---------------------------------------|---------------------------------------|---------------------------------------|---------------------------------------|
| Diabetes educators providing you information about teeth and gums using leaflets or pamphlets | <input type="checkbox"/> <sub>1</sub> | <input type="checkbox"/> <sub>2</sub> | <input type="checkbox"/> <sub>3</sub> | <input type="checkbox"/> <sub>4</sub> | <input type="checkbox"/> <sub>5</sub> |
| Diabetes educators providing you dental advice                                                | <input type="checkbox"/> <sub>1</sub> | <input type="checkbox"/> <sub>2</sub> | <input type="checkbox"/> <sub>3</sub> | <input type="checkbox"/> <sub>4</sub> | <input type="checkbox"/> <sub>5</sub> |
| Diabetes educators asking questions to find out about your teeth and gum problems             | <input type="checkbox"/> <sub>1</sub> | <input type="checkbox"/> <sub>2</sub> | <input type="checkbox"/> <sub>3</sub> | <input type="checkbox"/> <sub>4</sub> | <input type="checkbox"/> <sub>5</sub> |
| Diabetes educators looking your mouth and teeth                                               | <input type="checkbox"/> <sub>1</sub> | <input type="checkbox"/> <sub>2</sub> | <input type="checkbox"/> <sub>3</sub> | <input type="checkbox"/> <sub>4</sub> | <input type="checkbox"/> <sub>5</sub> |
| Diabetes educators providing you referrals to a dentist                                       | <input type="checkbox"/> <sub>1</sub> | <input type="checkbox"/> <sub>2</sub> | <input type="checkbox"/> <sub>3</sub> | <input type="checkbox"/> <sub>4</sub> | <input type="checkbox"/> <sub>5</sub> |
| Having priority access to public dental service                                               | <input type="checkbox"/> <sub>1</sub> | <input type="checkbox"/> <sub>2</sub> | <input type="checkbox"/> <sub>3</sub> | <input type="checkbox"/> <sub>4</sub> | <input type="checkbox"/> <sub>5</sub> |
| Receiving free vouchers to attend private dental clinics                                      | <input type="checkbox"/> <sub>1</sub> | <input type="checkbox"/> <sub>2</sub> | <input type="checkbox"/> <sub>3</sub> | <input type="checkbox"/> <sub>4</sub> | <input type="checkbox"/> <sub>5</sub> |

## 6. FAMILY AND SOCIAL SUPPORT

19. Some questions relate to your family/social support to access dental care. Mark ☒ one box to each question.

Yes No

Do you have someone (family or friend) to give you support when you have a dental problem? ☐<sub>1</sub> ☐<sub>2</sub>

Do you have someone (family or friend) to talk about your dental problems if you have any? ☐<sub>1</sub> ☐<sub>2</sub>

Do you have someone (family or friend) to who can take you to dental appointments if necessary? ☐<sub>1</sub> ☐<sub>2</sub>

Do you have financial support to see a dentist or have dental treatment if necessary? ☐<sub>1</sub> ☐<sub>2</sub>

Do you have easy access to transport if you need to go to dental appointment? ☐<sub>1</sub> ☐<sub>2</sub>

## 7. FINALLY, SOME QUESTIONS ABOUT YOU (DEMOGRAPHICS)

2. Gender ☐<sub>1</sub> Male ☐<sub>2</sub> Female

3. In which country were you born? \_\_\_\_\_

4. What language do you speak at home? \_\_\_\_\_

5. What is your post code? \_\_\_\_\_

6. When were you first diagnosed with diabetes? Year \_\_\_\_\_ or Age \_\_\_\_\_

7. Type of diabetes Mark ☒ one box.

☐<sub>1</sub> Type1 ☐<sub>2</sub> Type2 ☐<sub>3</sub> Gestational diabetes mellitus (GDM) ☐<sub>3</sub> Other \_\_\_\_\_

☐<sub>4</sub> Don't know

8. Thinking about the most recent blood glucose level test, how was your result? Mark ☒ one box.

☐<sub>1</sub> Too high ☐<sub>2</sub> About right ☐<sub>3</sub> Too low ☐<sub>4</sub> Don't know

9. Are you a current smoker? ☐<sub>1</sub> Yes ☐<sub>2</sub> No

10. Do you drink alcohol? ☐<sub>1</sub> Yes ☐<sub>2</sub> No

11. Do you have any other chronic diseases, apart from diabetes? Mark ☒ one box.

☐<sub>1</sub> Yes, please specify \_\_\_\_\_ ☐<sub>2</sub> No

12. Are you currently working? *Mark ☒ one box.*

☐<sub>1</sub> Working full time

☐<sub>2</sub> Working part time

☐<sub>3</sub> Not working

13. What is your highest educational qualification? *Mark ☒ one box.*

Primary school ☐<sub>1</sub>

Secondary school ☐<sub>2</sub>

High school ☐<sub>3</sub>

TAFE ☐<sub>4</sub>

University ☐<sub>5</sub>

No schooling ☐<sub>6</sub>

14. What is your marital status? *Mark ☒ one box.*

☐<sub>1</sub> Single

☐<sub>2</sub> Married/partnered

☐<sub>3</sub> Divorced

☐<sub>4</sub> Widowed

15. What is your combined annual household income? *Mark ☒ one box.*

Less than \$40,000 ☐<sub>1</sub>

\$40,000 to less than \$60,000 ☐<sub>2</sub>

\$60,000 to less than \$80,000 ☐<sub>3</sub>

\$80,000 to less than \$100,000 ☐<sub>4</sub>

\$100,000 to less than \$120,000 ☐<sub>5</sub>

More than \$120,000 ☐<sub>6</sub>

Don't know ☐<sub>7</sub>

16. Do you have private health insurance? *Mark ☒ one box.*

☐<sub>1</sub> Yes

☐<sub>2</sub> No

☐<sub>3</sub> Don't know

17. Do you currently have the following cards? *Mark ☒ all that apply.*

Pensioner concession card, ☐<sub>1</sub> Yes ☐<sub>2</sub> No ☐<sub>3</sub> Don't know

Health care card ☐<sub>1</sub> Yes ☐<sub>2</sub> No ☐<sub>3</sub> Don't know

Department of Veterans Affairs card ☐<sub>1</sub> Yes ☐<sub>2</sub> No ☐<sub>3</sub> Don't know

**\*THANK YOU FOR PARTICIPATING IN THIS SURVEY\***
