# Supplementary material for: Oral Health Status, Knowledge, and Behaviours of People with Diabetes in Sydney, Australia
Source: MDPI journal article supplement (doi:10.3390/ijerph18073464), 2021-03-26
Supplement: s1 [file s1]

**Table S1.** Recoded Study Variables.

| Variable Type             | Study Variables                  | Original                                   | Re-coded for Analysis           |
|---------------------------|----------------------------------|--------------------------------------------|---------------------------------|
| Demographic Variables     | Country of Birth                 | Australia                                  | Australia                       |
|                           |                                  | Other Countries                            | Overseas                        |
|                           | Language spoken at home          | English                                    | English                         |
|                           |                                  | Other languages                            | Other than English              |
| Socio-economic Variables  | Education Attained               | No Schooling                               | No schooling                    |
|                           |                                  | Primary School                             | Primary School                  |
|                           |                                  | Secondary School                           | High School                     |
|                           |                                  | High School                                |                                 |
|                           |                                  | TAFE                                       | TAFE                            |
|                           |                                  | University                                 | University                      |
|                           | Combined annual household income | Less than \$40,000                         | Less than \$40,000              |
|                           |                                  | \$40,000 to less than \$60,000             | \$40,000 to less than \$60,000  |
|                           |                                  | \$60,000 to less than \$80,000             | \$60,000 to less than \$80,000  |
|                           |                                  | \$80,000 to less than \$100,000            | \$80,000 to less than \$100,000 |
|                           |                                  | \$100,000 to less than \$120,000           | \$100,000 and more              |
|                           |                                  | More than \$120,000                        |                                 |
| Health Specific Variables | Health Insurance Status          | Don't know                                 | Missing (removed from analysis) |
|                           |                                  | Yes                                        | Have Health Insurance           |
|                           |                                  | No                                         | Do Not Have Health Insurance    |
|                           | Knowledge about oral health      | Don't know                                 | Missing (removed from analysis) |
|                           |                                  | Item 1, 3, 8, 9 & 10- True & Don't know    | Incorrect<br>Correct            |
|                           |                                  | False                                      |                                 |
|                           |                                  | Item 2, 4, 5, 6, 6 & 7- False & Don't know | Incorrect<br>Correct            |
|                           |                                  | True                                       |                                 |
|                           |                                  | True                                       |                                 |
|                           | Oral Health Status               | Excellent                                  | Good to Excellent               |
|                           |                                  | Very good                                  |                                 |
|                           |                                  | Good                                       |                                 |
|                           |                                  | Fair                                       | Fair to poor                    |
|                           |                                  | Poor                                       |                                 |

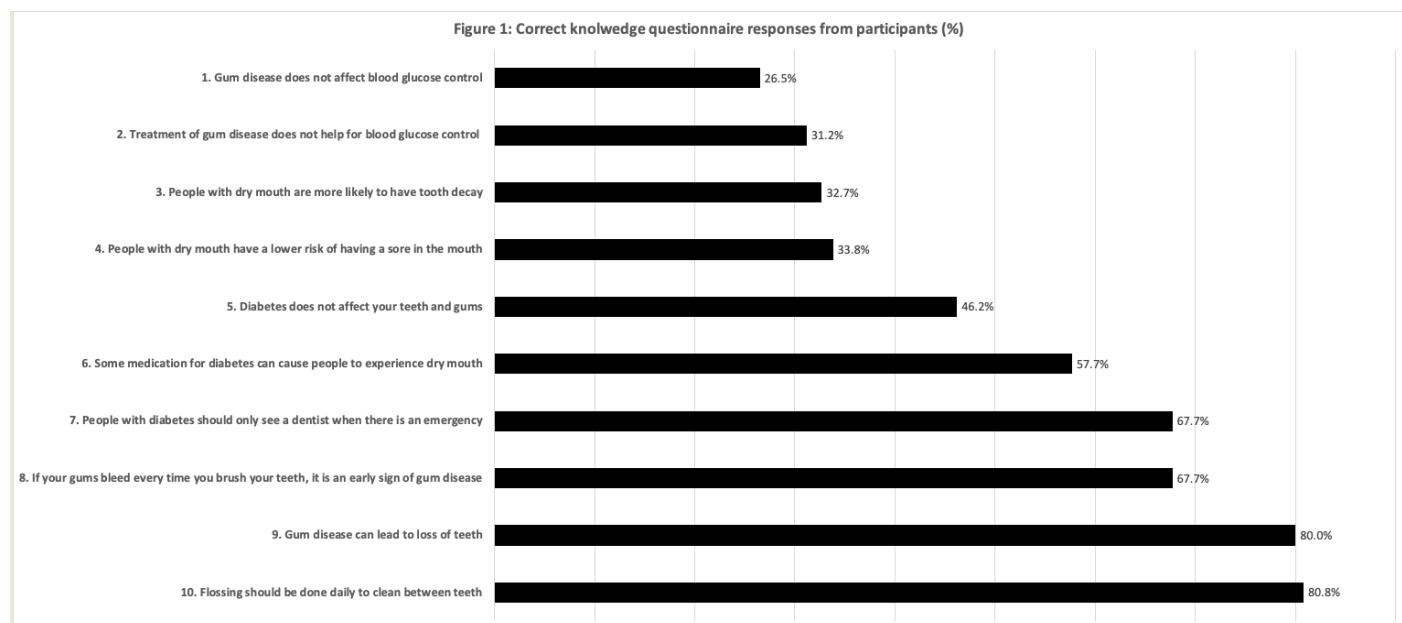

**Figure S1.** Correct knowledge questionnaire responses from participants.

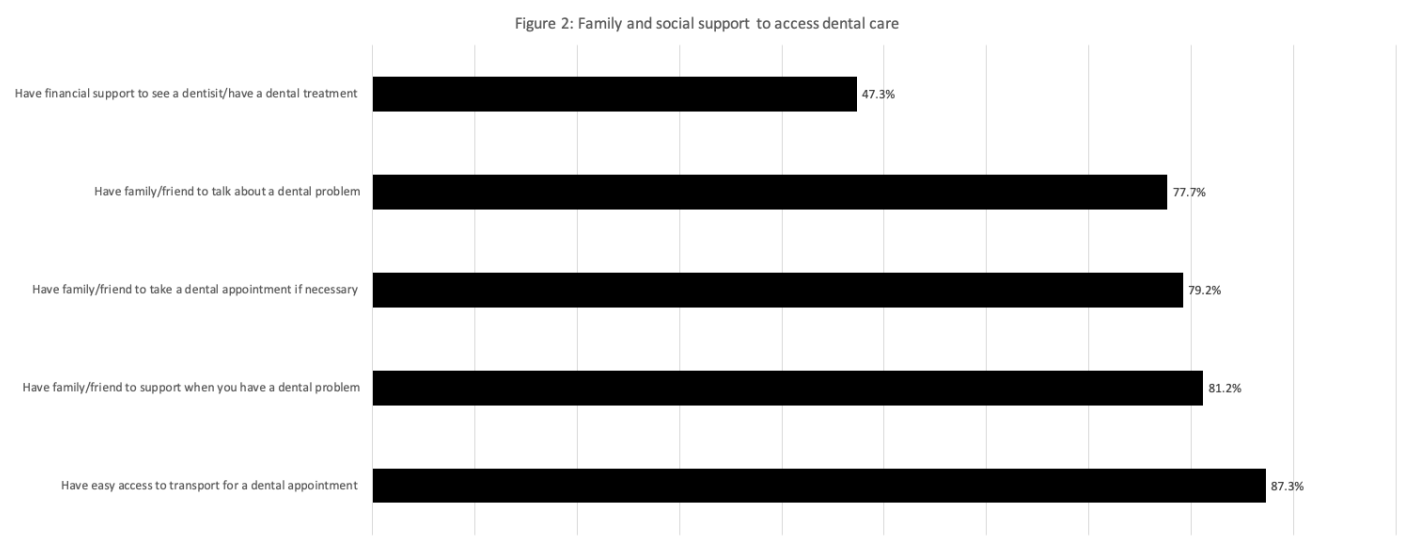

**Figure S2.** Family and social support to access dental care.
